# Supplementary material
Source: ML conference proceedings conference paper supplement (https://proceedings.mlr.press/v231/bainson24a.html)
Supplement: Supplementary file 1 [file bainson24a-supp.zip]

Archive with 1 entries (1 files):
- 23_SSL-12-14.pdf
